# Supplementary material for: Identification of copper (Cu) stress-responsive grapevine microRNAs and their target genes by high-throughput sequencing
Source: R Soc Open Sci. 2019 Jan 23;6(1):180735. doi: 10.1098/rsos.180735 (PMC6366190; doi:10.1098/rsos.180735)
Supplement: Table S8 [file rsos180735supp18.xlsx]

## Sheet: Sheet1
Table S8 Comparison of differently expressed miRNAs between Cu and cold stress in Vitis vinifer.
miR-name	List of miRNAs from leaves subjected to Cu stress			List of miRNAs from leaves subjected to cold stress
	Fold-change(log2 Cu/CK)	p-value	Regulated	Fold-change (log2 Cold/CK)	p-value	Regulated
vvi-miR3640*	-0.516532	0.141182	-	4.22397	2.22e-265	↑
vvi-miR3640	0.750654	2.71e-05	-	1.6107	9.18e-151	↑
vvi-miR3624	2.03194	1.87e-10	↑	1.5162	0	↑
vvi-miR3636	-1.26776	1.21e-08	↓	1.39404	0	↑
vvi-miR3634	-1.68141	0	↓	1.1265	7.97e-35	↑
vvi-miR164c	-1.67071	6.01e-41	↓	0.689037	0	-
vvi-miR164d	-1.679	6.61e-41	↓	0.686923	0	-
vvi-miR164a	-1.679	6.61e-41	↓	0.685913	0	-
vvi-miR396b	-1.66481	3.95e-209	↓	0.246039	4.89e-05	-
vvi-miR396d	-2.06068	0	↓	0.167098	0.00163981	-
vvi-miR168	-1.217	1.27e-56	↓	0.126173	4.31e-91	-
vvi-miR396c	-2.05828	0	↓	0.122078	0.0277177	-
vvi-miR535a	-1.55298	1.92e-10	↓	0.119159	0	-
vvi-miR535b	-1.55298	1.92e-10	↓	0.119159	0	-
vvi-miR535c	-1.55298	1.92e-10	↓	0.119153	0	-
vvi-miR162	-1.38294	0	↓	0.0089323	0.786487	-
vvi-miR166g	-2.62721	0	↓	-0.101257	0	-
vvi-miR166f	-2.62996	0	↓	-0.101374	0	-
vvi-miR166d	-2.63912	0	↓	-0.102529	0	-
vvi-miR166c	-2.63874	0	↓	-0.102752	0	-
vvi-miR166e	-2.63874	0	↓	-0.102752	0	-
vvi-miR166h	-2.60204	0	↓	-0.127042	0	-
vvi-miR169f	-2.35698	8.64e-07	↓	-0.176047	0.0388591	-
vvi-miR169g	-2.28233	5.94e-07	↓	-0.205749	0.016132	-
vvi-miR167b	-1.90524	2.55e-109	↓	-0.2132	0	-
vvi-miR167e	-2.20193	8.34e-122	↓	-0.215116	0	-
vvi-miR159c	-2.60986	0	↓	-0.21688	3.29e-22	-
vvi-miR167c	-1.94053	9.95e-25	↓	-0.274331	7.97e-46	-
vvi-miR482	-1.34052	0	↓	-0.282228	0.00240253	-
vvi-miR479	-2.66706	4.05e-12	↓	-0.288445	1.53e-36	-
vvi-miR396a	-2.15579	3.42e-21	↓	-0.2986	0.00197215	-
vvi-miR167d	-2.01228	4.42e-60	↓	-0.358255	0	-
vvi-miR156g	-1.59607	5.67e-28	↓	-0.523641	0	-
vvi-miR156i	-1.59607	5.67e-28	↓	-0.523642	0	-
vvi-miR156f	-1.59607	5.67e-28	↓	-0.523671	0	-
vvi-miR166b	-2.47451	0	↓	-0.574232	0	-
vvi-miR408	-4.05743	2.47e-31	↓	-0.584237	1.01e-83	-
vvi-miR166a	-2.44563	0	↓	-0.626894	0	-
vvi-miR156a	-2.64488	5.48e-08	↓	-0.660963	4.33e-260	-
vvi-miR171b	-2.64488	5.48e-08	↓	-0.740727	1.36e-14	-
vvi-miR169v	-1.79072	3.27e-08	↓	-0.78982	6.53e-26	-
vvi-miR169l	-2.89771	0.0012357	↓	-0.872021	7.78e-26	-
vvi-miR167a	-2.30063	6.05e-140	↓	-0.962333	6.42e-97	-
vvi-miR3633a	-1.51893	7.32e-79	↓	-0.97091	3.62e-305	-
vvi-miR171a	-1.68055	8.51e-11	↓	-1.02174	6.02e-24	↓
vvi-miR171i	-1.68055	8.51e-11	↓	-1.02174	6.02e-24	↓
vvi-miR171c	-1.50097	3.39e-12	↓	-1.02509	2.71e-27	↓
vvi-miR171d	-1.50097	3.39e-12	↓	-1.02915	1.84e-27	↓
vvi-miR156d	-2.04448	7.81e-08	↓	-1.06296	0	↓
vvi-miR156b	-1.99718	1.96e-07	↓	-1.06555	0	↓
vvi-miR156c	-1.99718	1.96e-07	↓	-1.07235	0	↓
vvi-miR172d	-1.53508	0.0033832	↓	-1.15125	1.41e-62	↓
vvi-miR397a	-7.63278	1.03e-06	↓	-1.30635	4.2e-283	↓
vvi-miR3633b*	-	-	-	-1.32587	5.23e-20	↓
vvi-miR398b	-5.69216	2.91e-29	↓	-1.36036	6.36e-19	↓
vvi-miR398c	-5.69216	2.91e-29	↓	-1.36036	6.36e-19	↓
vvi-miR3633b	-2.09924	0.0010695	↓	-1.62027	1.18e-21	↓
vvi-miR395g	-2.42113	3.15e-07	↓	-2.57573	0	↓
vvi-miR395a	-2.42113	3.15e-07	↓	-2.57598	0	↓
vvi-miR395b	-2.42113	3.15e-07	↓	-2.57598	0	↓
vvi-miR395c	-2.42113	3.15e-07	↓	-2.57598	0	↓
vvi-miR395d	-2.42113	3.15e-07	↓	-2.57598	0	↓
vvi-miR395e	-2.42113	3.15e-07	↓	-2.57598	0	↓
vvi-miR395h	-2.42113	3.15e-07	↓	-2.57598	0	↓
vvi-miR395i	-2.42113	3.15e-07	↓	-2.57598	0	↓
vvi-miR395j	-2.42113	3.15e-07	↓	-2.57598	0	↓
vvi-miR395k	-2.42113	3.15e-07	↓	-2.57598	0	↓
vvi-miR395l	-2.42113	3.15e-07	↓	-2.57598	0	↓
vvi-miR395m	-2.42113	3.15e-07	↓	-2.57598	0	↓
vvi-miR395f	-2.42113	3.15e-07	↓	-2.57718	0	↓
Note: ↑,↓denote up-regulated, down-regulated.
